# Supplementary material
Source: Springer Nature journal article supplement (https://www.springermedizin.de/resource/supplementary/12885_2011_2875_MOESM4_ESM.pdf/9462204)

CA IX/CD31

N

B

a

CA IX/CD31

B

b

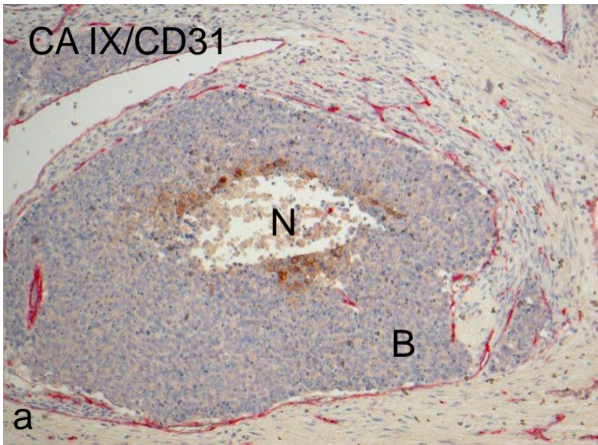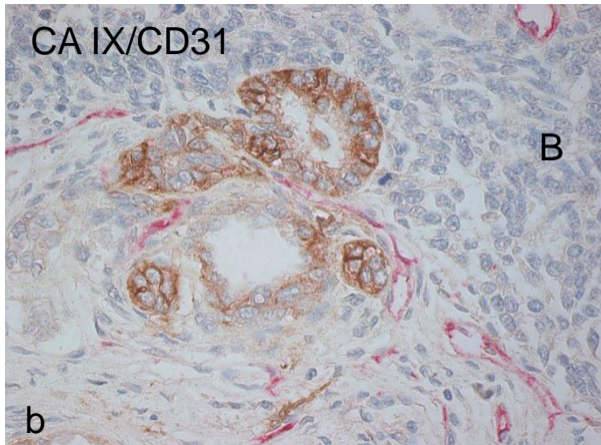

Supplement: MOESM4 [file 9462204]
